# Information for Authors

## Editor-in-Chief

Shapir Rosenberg, M.D.  
(University of South Florida)

## Senior Deputy Editor

Matthew L. Edwards, M.D.  
(Stanford University)

We invite proposals from readers for podcast interviews or guest-edited theme sections.

Submit proposals to  
[ajpresidentsjournalmedia@gmail.com](mailto:ajpresidentsjournalmedia@gmail.com)

## Submissions

*The Residents' Journal* considers manuscripts authored by medical students, resident physicians, and fellows in the United States and Canada.

To submit a manuscript, please visit <https://mc.manuscriptcentral.com/appi-ajp>, and select a manuscript type for *AJP Residents' Journal*. See [https://ajp.psychiatryonline.org/residents\\_journal/rj\\_ifora](https://ajp.psychiatryonline.org/residents_journal/rj_ifora) for more detailed instructions.

**Article:** Reports of novel observations and research. May include meta-analyses. Includes a 100-word structured or nonstructured abstract.

**Drug Review:** A review of a pharmacological agent that highlights mechanism of action, efficacy, side-effects and drug interactions.

**Case Report:** A presentation and discussion of an unusual clinical

event. All patient information must be adequately disguised, with written consent of the patient described.

**Commentary:** Generally includes descriptions of recent events, opinion pieces, or narratives.

**History of Psychiatry:** Provides a historical perspective on a topic relevant to psychiatry.

**Arts and Culture:** Includes introspective pieces, poetry, and reviews of books and films. All submissions must be relevant to the field of psychiatry.

**Letters to the Editor:** Comments on articles published in the *Residents' Journal* will be considered for publication if received within 1 month of publication of the original article.

| Manuscript Type       | Word Limit | Maximum Figures and Tables | Key Points* | Maximum References |
|-----------------------|------------|----------------------------|-------------|--------------------|
| Article**             | 1,500      | 2                          | Yes         | 20                 |
| Drug Review           | 1,500      | 2                          | Yes         | 20                 |
| Case Report           | 1,500      | 2                          | Yes         | 20                 |
| Commentary            | 600        | 0                          |             | 5                  |
| History of Psychiatry | 600        | 0                          |             | 5                  |
| Arts and Culture      | 600        | 0                          |             | 5                  |
| Letters to the Editor | 300        | 0                          |             | 5                  |

\*Box with 3–4 key teaching points

\*\*All Articles must include a 100-word abstract.
